# Supplementary material
Source: ML conference proceedings conference paper supplement (https://aclanthology.org/2020.emnlp-main.234)
Supplement: OptionalSupplementaryMaterial [file 2020.emnlp-main.234.OptionalSupplementaryMaterial.zip]

## A Appendix: sufficiency of $l$ and full conditional for $b$

Recall that the one-step-ahead conditional probability mass function in a Pólya sequence taking values in  $\mathbb{N}$  with concentration parameter  $\alpha$  and base probability mass function  $\Psi$  is

$$p(z_i \mid z_{i-1}, \dots, z_1, \Psi) = \sum_{j=1}^{i-1} \frac{1}{i-1+\alpha} \mathbb{1}_{z_j}(z_i) + \frac{\alpha}{i-1+\alpha} \Psi_{z_i}. \quad (30)$$

Introducing the random variable

$$b_i \sim \text{Ber}\left(\frac{\alpha}{i-1+\alpha}\right) \quad (31)$$

we can express the one-step-ahead conditional distribution as

$$p(z_i \mid z_{i-1}, \dots, z_1, b_i, \Psi) = \mathbb{1}_{b_i=0} \sum_{j=1}^{i-1} \frac{1}{i-1} \mathbb{1}_{z_j}(z_i) + \mathbb{1}_{b_i=1} \Psi_{z_i}. \quad (32)$$

The joint probability mass function for  $\mathbf{z} \mid \mathbf{b}, \Psi$  is then

$$p(\mathbf{z} \mid \mathbf{b}, \Psi) = \prod_{i=1}^N p(z_i \mid z_{i-1}, \dots, z_1, \mathbf{b}, \Psi) = \prod_{i=1}^N \left[ \sum_{j=1}^{i-1} \mathbb{1}_{b_i=0} \mathbb{1}_{z_j}(z_i) + \mathbb{1}_{b_i=1} \Psi_{z_i} \right]. \quad (33)$$

Note that  $\mathbb{1}_{b_i=0} = 1 \iff \mathbb{1}_{b_i=1} = 0$  and vice versa. Thus each term in the product for  $\mathbf{z} \mid \mathbf{b}, \Psi$  only has one component, and we may express  $\mathbf{z} \mid \mathbf{b}, \Psi$  as

$$p(\mathbf{z} \mid \mathbf{b}, \Psi) = \underbrace{\prod_{\substack{i=1 \\ b_i \neq 1}}^N \sum_{j=1}^{i-1} \frac{1}{i-1} \mathbb{1}_{z_j}(z_i)}_{\text{doesn't enter posterior}} \prod_{\substack{i=1 \\ b_i=1}}^N \prod_{k=1}^{\infty} \Psi_k^{\mathbb{1}_k(z_i)} \quad (34)$$

where we have re-expressed the probability mass function of  $\Psi$  in a form that emphasizes conjugacy. Thus for any prior, the posterior will only depend on the likelihood of the values of  $z_i$  for which  $b_i = 1$ . The sufficient statistic is

$$l_k = \sum_{\substack{i=1 \\ b_i=1}}^N \mathbb{1}_{z_i=k}. \quad (35)$$

Next, for a given  $i' \in \{1, \dots, N\}$ , we can calculate the posterior of a component  $b_{i'}$  as

$$\mathbb{P}(b_{i'} = 1 \mid \mathbf{z}, \Psi, \mathbf{b}_{-i'}) \propto \left( \frac{\alpha}{i'-1+\alpha} \right) \prod_{\substack{i=1 \\ b_i \neq 1}}^N \sum_{j=1}^{i-1} \frac{1}{i-1} \mathbb{1}_{z_j}(z_i) \prod_{\substack{i=1 \\ b_i=1}}^N \Psi_{z_i} \quad (36)$$

$$\propto \alpha \Psi_{z_{i'}} \quad (37)$$

$$\mathbb{P}(b_{i'} = 0 \mid \mathbf{z}, \Psi, \mathbf{b}_{-i'}) \propto \left( \frac{i'-1}{i'-1+\alpha} \right) \prod_{\substack{i=1 \\ b_i \neq 1}}^N \sum_{j=1}^{i-1} \frac{1}{i-1} \mathbb{1}_{z_j}(z_i) \prod_{\substack{i=1 \\ b_i=1}}^N \Psi_{z_i} \quad (38)$$

$$\propto \sum_{i=1}^{i'-1} \mathbb{1}_{z_i}(z_{i'}) \quad (39)$$

where we have divided both expressions by

$$\frac{1}{i'-1+\alpha} \prod_{\substack{i=1 \\ b_i \neq 1 \\ i \neq i'}}^N \sum_{j=1}^{i-1} \frac{1}{i-1} \mathbb{1}_{z_j}(z_i) \prod_{\substack{i=1 \\ b_i=1 \\ i \neq i'}}^N \Psi_{z_i} \quad (40)$$

which is constant with respect to  $b_{i'}$ . Note that full conditionally, we have  $b_i \perp\!\!\!\perp b_{i'}$  for  $i \neq i'$ . This gives the desired expressions and concludes the derivation.

## B Appendix: full conditional for $\Psi$

Before proceeding with the derivation, we first comment on Proposition 1 and differences between the GEM distribution and Dirichlet process, which otherwise appear superficially similar. The GEM distribution  $\Psi^{\text{GEM}} \sim \text{GEM}(\gamma)$  is defined as

$$\Psi_k^{\text{GEM}} = \varsigma_k \prod_{i=1}^{k-1} (1 - \varsigma_i) \quad \varsigma_k^{\text{GEM}} \sim \text{Beta}(1, \gamma). \quad (41)$$

On the other hand, a Dirichlet process  $\Psi^{\text{DP}} \sim \text{DP}(\gamma, F)$  is defined as

$$\Psi^{\text{DP}} = \sum_{k=1}^{\infty} \pi_k \delta_{\vartheta_k} \quad \vartheta_k \sim F \quad \pi_k = \varsigma_k \prod_{i=1}^{k-1} (1 - \varsigma_i) \quad \varsigma_k \sim \text{Beta}(1, \gamma). \quad (42)$$

From a Bayesian perspective, this extra stage—the presence of  $\vartheta_k$ —prevents one from applying standard results on conjugacy of Dirichlet processes. The joint distribution of a finite set of states  $(\Psi_{k_1}^{\text{GEM}}, \dots, \Psi_{k_K}^{\text{GEM}})$  does not admit a closed-form expression, so we seek to derive the posterior conditional in a different way.

Rather than proving conjugacy for  $(\Psi_{k_1}^{\text{GEM}}, \dots, \Psi_{k_K}^{\text{GEM}})$  directly, we look for a larger finite-dimensional distribution within which  $(\Psi_{k_1}^{\text{GEM}}, \dots, \Psi_{k_K}^{\text{GEM}})$  sits that has better conjugacy properties. The *generalized Dirichlet* distribution of [Connor and Mosimann \(1969\)](#) fulfills this criteria. The conjugacy relationship we seek follows from the general property that conditioning and marginalization commute. This will be shown to yield the posterior

$$\Psi_k^{\text{GEM}} = \varsigma_k \prod_{i=1}^{k-1} (1 - \varsigma_i) \quad \varsigma_k \sim \text{Beta}(a_k^{(\Psi)}, b_k^{(\Psi)}) \quad a_k^{(\Psi)} = 1 + l_k \quad b_k^{(\Psi)} = \gamma + \sum_{i=k+1}^{\infty} l_i. \quad (43)$$

For comparison, a posterior Dirichlet process is given by

$$\Psi^{\text{DP}} = \sum_{k=1}^{\infty} \pi_k \delta_{\vartheta_k} \quad \vartheta_k \sim \frac{n}{\alpha + n} \mathbf{l} + \frac{\alpha}{\alpha + n} F \quad \pi_k = \varsigma_k \prod_{i=1}^{k-1} (1 - \varsigma_i) \quad \varsigma_k \sim \text{Beta}(1, \gamma + n) \quad (44)$$

which shows that this relatively mild difference in the prior yields a posterior of a rather different form.

We now proceed to formally calculate this posterior distribution, starting from a GEM prior and discrete likelihood. Since we are working in a nonparametric setting, we begin by introducing the necessary formalism. We then introduce our finite-dimensional approximating prior and compute the posterior under it. For this, we use commutativity of conditioning and marginalization to deduce the full infinite-dimensional posterior.

**Definition 2 (Preliminaries).** Let  $(\Omega, \mathcal{F}, \mathbb{P})$  be a probability space. Let  $\mathcal{M}_s(\mathbb{N})$  be the space of signed measures, equipped with the topology of weak convergence. Let  $\mathcal{M}_1(\mathbb{N}) \subset \mathcal{M}_s(\mathbb{N})$  be the space of probability measures over  $\mathbb{N}$ , and identify  $\mathcal{M}_1(\mathbb{N})$  with the probability simplex by the homeomorphism  $\mathcal{M}_1(\mathbb{N}) \cong \{\mathbf{x} \in \ell^1 : \forall i, x_i > 0, \sum_{i=1}^{\infty} x_i = 1\}$ . Let  $N \in \mathbb{N}$ , let  $\mathbf{x} \in \mathbb{N}^N$ , and let  $\mathbf{l} \in \mathbb{N}^N$  be its empirical counts, defined by  $\mathbf{l} = \sum_{i=1}^N \mathbf{1}_{x_i}$  where  $\mathbf{1}_{x_i}$  is equal to 1 for coordinate  $x_i$  and 0 for all other coordinate. Let  $\gamma \in \mathbb{R}^+$ . Recall that  $\mathbb{N}^N$  and  $\mathcal{M}_1(\mathbb{N})$ , endowed with the discrete topology and topology of weak convergence, respectively, are both Polish spaces—hence, the Disintegration Theorem ([Ambrosio et al. \(2005\)](#), Theorem 5.3.1; [Bogachev \(2007\)](#), Corollary 10.4.15) holds in both spaces. We associate each random variable  $y : \Omega \rightarrow Y$  with its pushforward probability measure  $\pi_y(A_y) = [y_* \mathbb{P}](A_y) = \mathbb{P}[y^{-1}(A_y)]$ , and each conditional random variables  $\theta | y : \Omega \times Y \rightarrow \Theta$  with its pushforward regular conditional probability measure  $\pi_{y|\theta}(A_y | \theta) = [(y | \theta)_* \mathbb{P}](A_y) = \mathbb{P}[(y | \theta)^{-1}(A_y)]$ , where the preimage is taken with respect to  $y$ .

**Definition 3** (Discrete likelihood). For all  $\Psi \in \mathcal{M}_1(\mathbb{N})$ , define the conditional random variable  $\mathbf{x} \mid \Psi : \Omega \times \mathcal{M}_1(\mathbb{N}) \rightarrow \mathbb{N}^N$  by its probability mass function

$$p(\mathbf{x} \mid \Psi) = \prod_{i=1}^N \prod_{k=1}^{\infty} \Psi_k^{\mathbb{1}_k(x_i)}. \quad (45)$$

We say  $\mathbf{x} \mid \Psi \sim \text{Discrete}(\Psi)$ .

**Definition 4** (GEM). Let  $\Psi : \Omega \rightarrow \mathcal{M}_1(\mathbb{N})$  be a random variable defined by

$$\Psi_k = \varsigma_k \prod_{i=1}^{k-1} (1 - \varsigma_i) \quad \varsigma_k \sim \text{Beta}(1, \gamma). \quad (46)$$

We say  $\Psi \sim \text{GEM}(\gamma)$ .

**Definition 5** (Finite GEM). Let  $\Psi : \Omega \rightarrow \mathcal{M}_1(\mathbb{N})$  be a random variable defined by

$$\Psi_k = \varsigma_k \prod_{i=1}^{k-1} (1 - \varsigma_i) \quad \varsigma_k \sim \text{Beta}(1, \gamma) \quad \varsigma_K = 1. \quad (47)$$

We say  $\Psi \sim \text{FGEM}(\gamma, K)$ .

**Definition 6** (Posterior). Let  $\Psi \mid \mathbf{x}$  be the unique conditional random variable given by the Disintegration Theorem, where uniqueness follows from almost sure uniqueness by virtue of the marginal measure  $\pi_{\mathbf{x}}(\cdot) = \int_{\mathcal{M}_1(\mathbb{N})} \pi_{\mathbf{x} \mid \Psi}(\cdot \mid \Psi) d\pi_{\Psi}$  being absolutely continuous with respect to the counting measure on  $\mathbb{N}^N$ , which has no non-empty null sets.

**Result 7.** Let  $\mathbf{x} \mid \Psi \sim \text{Discrete}(\Psi)$ . Let  $\mathbf{x} \in \mathbb{N}^N$ , and let  $K > \sup \mathbf{x}$ . Let  $\Psi \sim \text{FGEM}(\gamma, K)$ . Then for any  $\mathbf{x}$  with empirical counts  $\mathbf{l}$ , we have that  $\Psi \mid \mathbf{x} : \Omega \times \mathbb{N}^N \rightarrow \mathcal{M}_1(\mathbb{N})$  is a conditional random variable defined by

$$\Psi_k = \varsigma_k \prod_{i=1}^{k-1} (1 - \varsigma_i) \quad \varsigma_k \sim \text{Beta}(a_k^{(\Psi)}, b_k^{(\Psi)}) \quad \varsigma_K = 1 \quad (48)$$

where

$$a_k^{(\Psi)} = 1 + l_k \quad b_k^{(\Psi)} = \gamma + \sum_{i=k+1}^K l_i. \quad (49)$$

*Proof.* It is shown by [Connor and Mosimann \(1969\)](#) that  $\Psi \sim \text{FGEM}(\gamma, K)$  is a special case of the *generalized Dirichlet* distribution, which admits a general stick-breaking representation. Thus, its probability density function is

$$f(\Psi) \propto \Psi_K^{\gamma-1} \prod_{k=1}^{K-1} \left[ \sum_{k'=1}^K \Psi_{k'} \right]^{-1} \quad (50)$$

which we have expressed in a simplified form. By conjugacy, for a given  $\mathbf{x}$  and associated  $\mathbf{l}$  the posterior probability density is

$$f(\Psi \mid \mathbf{x}) \propto \Psi_K^{(\gamma+l_K)-1} \prod_{k=1}^{K-1} \left[ \Psi_k^{(1+l_k)-1} \left[ \sum_{k'=k}^K \Psi_{k'} \right]^{\gamma + \sum_{i=k}^K l_i - [(1+l_k) + \gamma + \sum_{i=k+1}^K l_i]} \right] \quad (51)$$

which is again a generalized Dirichlet admitting the necessary stick-breaking representation, which we have expressed in a form that emphasizes its posterior hyperparameters.  $\square$

**Remark 8.** It is now clear that the assumption  $\mathbf{x} \mid \Psi \sim \text{Discrete}(\Psi)$  is indeed taken without loss of generality, because if we instead took  $\mathbf{x} \mid \Psi$  to be given by a Pólya sequence, then by sufficiency the prior-to-posterior map would be identical.

**Proposition 1.** Without loss of generality, suppose

$$\Psi \sim \text{GEM}(\gamma) \qquad \mathbf{x} \mid \Psi \sim \text{Discrete}(\Psi). \quad (52)$$

Then  $\Psi \mid \mathbf{x}$  is given by

$$\Psi_k = \varsigma_k \prod_{i=1}^{k-1} (1 - \varsigma_i) \quad \varsigma_k \sim \text{Beta}(a_k^{(\Psi)}, b_k^{(\Psi)}) \quad a_k^{(\Psi)} = 1 + l_k \quad b_k^{(\Psi)} = \gamma + \sum_{i=k+1}^{\infty} l_i \quad (53)$$

where  $l$  are the empirical counts of  $\mathbf{x}$ .

*Proof.* Let  $I \subset \mathbb{N}$  be an arbitrary finite index set, and let  $\Psi_I \mid \mathbf{x}$  be the finite-dimensional marginal projection of  $\Psi \mid \mathbf{x}$  onto the coordinates contained in  $I$ . Let  $K > \sup I$ , let  $\Psi^{(K)} \mid \mathbf{x}$  be the posterior conditional random variable under  $\Psi^{(K)} \sim \text{FGEM}(\gamma, K)$ , and let  $\Psi_I^{(K)} \mid \mathbf{x}$  be the marginal consisting of those coordinates contained in  $I$ . By construction,  $\Psi_I^{(K)} \mid \mathbf{x}$  equals  $\Psi_I \mid \mathbf{x}$  in distribution. Since by the Disintegration Theorem, conditioning and marginalization commute, the set  $I$  is arbitrary, and  $\Psi \mid \mathbf{x}$  is uniquely determined by its finite-dimensional marginal projections, the claim follows.  $\square$

## C Appendix: quantile summary of topics for AP

Here we display a multi-quantile summary for AP, obtained by ranking all topics with at least 100 tokens by their total number of tokens, computing the  $\varpi = 100\%$ , 75%, 50%, 25%, and 5% quantiles. We compute the five topics closest to each quantile by number of tokens, and display their top-eight words.

|    |                                         |             |            |             |            |               |
|----|-----------------------------------------|-------------|------------|-------------|------------|---------------|
| AP | $k$<br>$n_{k,\cdot}$                    | Topic 1     | Topic 2    | Topic 3     | Topic 4    | Topic 5       |
|    |                                         | 93 207      | 57 249     | 15 874      | 13 360     | 10 176        |
| AP | partially collapsed<br>$\varpi = 100\%$ | week        | people     | police      | percent    | trial         |
|    |                                         | made        | years      | people      | year       | court         |
|    |                                         | president   | year       | killed      | prices     | charges       |
|    |                                         | officials   | time       | man         | economic   | case          |
|    |                                         | tuesday     | don        | officials   | economy    | judge         |
|    |                                         | million     | back       | city        | rate       | attorney      |
|    |                                         | thursday    | day        | shot        | increase   | prison        |
|    |                                         | national    | home       | authorities | report     | jury          |
| AP | $k$<br>$n_{k,\cdot}$                    | Topic 54    | Topic 55   | Topic 56    | Topic 57   | Topic 58      |
|    |                                         | 1 055       | 1 032      | 1 025       | 1 014      | 1 013         |
| AP | partially collapsed<br>$\varpi = 75\%$  | children    | north      | hostages    | aids       | percent       |
|    |                                         | parents     | walsh      | red         | virus      | poll          |
|    |                                         | child       | reagan     | release     | blood      | survey        |
|    |                                         | ms          | iran       | held        | disease    | points        |
|    |                                         | year        | contra     | hostage     | drug       | found         |
|    |                                         | mother      | documents  | anderson    | infected   | surveys       |
|    |                                         | boys        | gesell     | gunmen      | immune     | margin        |
|    |                                         | girl        | arms       | thursday    | health     | reported      |
| AP | $k$<br>$n_{k,\cdot}$                    | Topic 108   | Topic 109  | Topic 110   | Topic 111  | Topic 112     |
|    |                                         | 473         | 472        | 451         | 446        | 436           |
| AP | partially collapsed<br>$\varpi = 50\%$  | abortion    | women      | solidarity  | waste      | train         |
|    |                                         | souter      | club       | walesa      | garbage    | railroad      |
|    |                                         | anti        | members    | poland      | recycling  | cars          |
|    |                                         | state       | men        | polish      | city       | trains        |
|    |                                         | women       | male       | government  | ash        | transportatio |
|    |                                         | abortions   | membership | mazowiecki  | trash      | skinner       |
|    |                                         | rights      | female     | jaruzelski  | state      | transit       |
|    |                                         | hampshire   | black      | talks       | dump       | policy        |
| AP | $k$<br>$n_{k,\cdot}$                    | Topic 162   | Topic 163  | Topic 164   | Topic 165  | Topic 166     |
|    |                                         | 193         | 187        | 185         | 184        | 184           |
| AP | partially collapsed<br>$\varpi = 25\%$  | health      | wine       | miners      | dixon      | barry         |
|    |                                         | care        | warmus     | mine        | yates      | moore         |
|    |                                         | spe         | solomon    | coal        | count      | jackson       |
|    |                                         | bc          | california | mines       | tosh       | mayor         |
|    |                                         | weight      | bar        | hull        | rogers     | statehood     |
|    |                                         | american    | gallo      | pittston    | rig        | mr            |
|    |                                         | diet        | test       | benefits    | russell    | gregory       |
|    |                                         | cholesterol | questions  | platform    | cookies    | room          |
| AP | $k$<br>$n_{k,\cdot}$                    | Topic 206   | Topic 207  | Topic 208   | Topic 209  | Topic 210     |
|    |                                         | 117         | 115        | 112         | 111        | 111           |
| AP | partially collapsed<br>$\varpi = 5\%$   | pageant     | mall       | roberts     | stuart     | gold          |
|    |                                         | miss        | malls      | shell       | lawn       | polaroid      |
|    |                                         | cereal      | pinochet   | boigny      | dea        | shamrock      |
|    |                                         | boxes       | shopping   | houphouet   | boston     | fields        |
|    |                                         | contestants | downtown   | travelers   | ruth       | consolidated  |
|    |                                         | box         | park       | leonard     | yankees    | suit          |
|    |                                         | america     | oak        | arsenal     | foundation | proposals     |
|    |                                         | bruce       | usa        | oil         | richman    | mining        |

|                                             |                                            |                                                                                           |                                                                                        |                                                                                                |                                                                                          |                                                                                     |
|---------------------------------------------|--------------------------------------------|-------------------------------------------------------------------------------------------|----------------------------------------------------------------------------------------|------------------------------------------------------------------------------------------------|------------------------------------------------------------------------------------------|-------------------------------------------------------------------------------------|
| AP<br>direct assignment<br>$\varpi = 100\%$ | $k$<br>$n_{k,\bullet}$                     | Topic 1<br>90 497                                                                         | Topic 2<br>18 626                                                                      | Topic 3<br>10 832                                                                              | Topic 4<br>9 923                                                                         | Topic 5<br>9 430                                                                    |
|                                             |                                            | year<br>people<br>time<br>president<br>years<br>made<br>state<br>week                     | years<br>year<br>people<br>time<br>don<br>home<br>day<br>back                          | police<br>people<br>killed<br>government<br>reported<br>today<br>capital<br>violence           | dollar<br>market<br>stock<br>yen<br>index<br>late<br>trading<br>exchange                 | percent<br>year<br>rose<br>sales<br>million<br>billion<br>month<br>reported         |
|                                             | $k$<br>$n_{k,\bullet}$                     | Topic 93<br>784                                                                           | Topic 94<br>757                                                                        | Topic 95<br>753                                                                                | Topic 96<br>745                                                                          | Topic 97<br>738                                                                     |
|                                             | AP<br>direct assignment<br>$\varpi = 75\%$ | keating<br>deconcini<br>lincoln<br>senators<br>regulators<br>meeting<br>committee<br>gray | bus<br>driver<br>train<br>greyhound<br>accident<br>passengers<br>railroad<br>passenger | eastern<br>pilots<br>airline<br>orion<br>air<br>union<br>airlines<br>service                   | united<br>states<br>nations<br>resolution<br>international<br>plo<br>mission<br>assembly | smoking<br>cigarettes<br>farmers<br>tobacco<br>ban<br>insurance<br>batus<br>smokers |
|                                             | $k$<br>$n_{k,\bullet}$                     | Topic 186<br>346                                                                          | Topic 187<br>338                                                                       | Topic 188<br>338                                                                               | Topic 189<br>338                                                                         | Topic 190<br>334                                                                    |
|                                             | AP<br>direct assignment<br>$\varpi = 50\%$ | power<br>franc<br>jersey<br>bradley<br>utility<br>wppss<br>utilities<br>west              | cable<br>television<br>nbc<br>tempo<br>hsn<br>industry<br>subscribers<br>tv            | conservatives<br>flag<br>conservative<br>amendment<br>speaker<br>darman<br>kemp<br>republicans | water<br>dam<br>river<br>area<br>reservoir<br>savannah<br>corps<br>canyon                | dental<br>funds<br>claims<br>plough<br>oral<br>counter<br>embassy<br>mid            |
|                                             | $k$<br>$n_{k,\bullet}$                     | Topic 279<br>220                                                                          | Topic 280<br>219                                                                       | Topic 281<br>219                                                                               | Topic 282<br>219                                                                         | Topic 283<br>218                                                                    |
|                                             | AP<br>direct assignment<br>$\varpi = 25\%$ | fernandez<br>fdic<br>republicbank<br>weicker<br>virginia<br>ruth<br>robinson<br>station   | water<br>lake<br>mussels<br>neill<br>erie<br>problem<br>plant<br>north                 | bloom<br>minnick<br>walters<br>lawyer<br>athletes<br>college<br>suspect<br>signing             | canadian<br>lee<br>ritalin<br>murphy<br>domestic<br>security<br>woods<br>radio           | election<br>grenada<br>boigny<br>houphouet<br>gairy<br>coast<br>nov<br>failed       |
| AP<br>direct assignment<br>$\varpi = 5\%$   | $k$<br>$n_{k,\bullet}$                     | Topic 354<br>133                                                                          | Topic 355<br>133                                                                       | Topic 356<br>133                                                                               | Topic 357<br>132                                                                         | Topic 358<br>132                                                                    |
|                                             |                                            | machine<br>stop<br>reed<br>gun<br>chief<br>sununu<br>geneva<br>formal                     | young<br>johnston<br>golf<br>notes<br>bodies<br>homes<br>call<br>shortage              | count<br>forman<br>festival<br>rig<br>arts<br>hughes<br>lights<br>staged                       | reynolds<br>premier<br>bond<br>release<br>news<br>regulated<br>address<br>petition       | turkey<br>department<br>bird<br>cooking<br>wash<br>bacteria<br>stuffed<br>adams     |

## D Appendix: quantile summary of topics for CGCBIB

Here we display a multi-quantile summary for CGCBIB, obtained by ranking all topics with at least 100 tokens by their total number of tokens, computing the  $\varpi = 100\%$ , 75%, 50%, 25%, and 5% quantiles. We compute the five topics closest to each quantile by number of tokens, and display their top-eight words.

|        |                                         |                      |                                                                                          |                                                                                         |                                                                                                 |                                                                                           |                                                                                        |
|--------|-----------------------------------------|----------------------|------------------------------------------------------------------------------------------|-----------------------------------------------------------------------------------------|-------------------------------------------------------------------------------------------------|-------------------------------------------------------------------------------------------|----------------------------------------------------------------------------------------|
| CGCBIB | partially collapsed<br>$\varpi = 100\%$ | $k$<br>$n_{k,\cdot}$ | Topic 1<br>110 702                                                                       | Topic 2<br>58 811                                                                       | Topic 3<br>27 084                                                                               | Topic 4<br>21 215                                                                         | Topic 5<br>19 832                                                                      |
|        |                                         |                      | elegans<br>caenorhabditi<br>nematode<br>results<br>found<br>show<br>observed<br>specific | elegans<br>protein<br>caenorhabditi<br>gene<br>function<br>proteins<br>required<br>show | elegans<br>genetic<br>molecular<br>development<br>caenorhabditi<br>nematode<br>studies<br>model | gene<br>elegans<br>sequence<br>protein<br>caenorhabditi<br>amino<br>cdna<br>acid          | mutations<br>gene<br>mutants<br>genes<br>mutant<br>elegans<br>caenorhabditi<br>alleles |
| CGCBIB | partially collapsed<br>$\varpi = 75\%$  | $k$<br>$n_{k,\cdot}$ | Topic 54<br>2 166                                                                        | Topic 55<br>2 061                                                                       | Topic 56<br>2 048                                                                               | Topic 57<br>2 040                                                                         | Topic 58<br>2 025                                                                      |
|        |                                         |                      | germ<br>germline<br>early<br>granules<br>cells<br>embryos<br>somatic<br>line             | egl<br>egg<br>laying<br>serotonin<br>neurons<br>cat<br>dopamine<br>mutants              | emb<br>temperature<br>mutants<br>sensitive<br>zyg<br>maternal<br>expression<br>embryonic        | spe<br>sperm<br>fer<br>spermatzoa<br>membrane<br>spermatids<br>spermatogenes<br>pseudopod | wnt<br>mom<br>pop<br>signaling<br>bar<br>pathway<br>lin<br>worm                        |
| CGCBIB | partially collapsed<br>$\varpi = 50\%$  | $k$<br>$n_{k,\cdot}$ | Topic 109<br>930                                                                         | Topic 110<br>916                                                                        | Topic 111<br>915                                                                                | Topic 112<br>900                                                                          | Topic 113<br>893                                                                       |
|        |                                         |                      | vit<br>yolk<br>vitellogenin<br>genes<br>yp<br>proteins<br>vpe<br>lrp                     | binding<br>affinity<br>site<br>activity<br>sites<br>avermectin<br>elegans<br>membrane   | kinesin<br>klp<br>transport<br>motor<br>ift<br>cilia<br>dynein<br>movement                      | growth<br>survival<br>mortality<br>population<br>rate<br>populations<br>parameter<br>size | eat<br>pharyngeal<br>pharynx<br>pumping<br>inx<br>gap<br>feeding<br>junctions          |
| CGCBIB | partially collapsed<br>$\varpi = 25\%$  | $k$<br>$n_{k,\cdot}$ | Topic 164<br>386                                                                         | Topic 165<br>369                                                                        | Topic 166<br>368                                                                                | Topic 167<br>364                                                                          | Topic 168<br>360                                                                       |
|        |                                         |                      | mlc<br>mel<br>myosin<br>nmy<br>chain<br>elongation<br>rho<br>phosphatase                 | dom<br>effects<br>humic<br>pyrene<br>effect<br>bioconcentrat<br>dissolved<br>substances | innate<br>immune<br>immunity<br>abf<br>lys<br>toll<br>antimicrobial<br>pathway                  | vha<br>atpase<br>subunit<br>genes<br>vacuolar<br>subunits<br>atpases<br>type              | ife<br>cap<br>eife<br>capping<br>cel<br>gtp<br>isoforms<br>rna                         |
| CGCBIB | partially collapsed<br>$\varpi = 5\%$   | $k$<br>$n_{k,\cdot}$ | Topic 208<br>141                                                                         | Topic 209<br>141                                                                        | Topic 210<br>140                                                                                | Topic 211<br>140                                                                          | Topic 212<br>136                                                                       |
|        |                                         |                      | ubq<br>gc<br>tbp<br>footprints<br>oscillin<br>tlf<br>ubiquitin<br>tata                   | asp<br>salmonella<br>poona<br>enterica<br>clp<br>serotype<br>necrotic<br>mug            | da<br>cl<br>fli<br>gs<br>db<br>glu<br>phospholipid<br>tg                                        | ion<br>diet<br>relative<br>xpa<br>groups<br>carbon<br>characteristi<br>atoms              | hcf<br>cehcf<br>vp<br>ldb<br>cell<br>mammalian<br>phosphorylati<br>neural              |

|        |                                                                 |                                                                                           |                                                                                                 |                                                                                       |                                                                                             |                                                                                            |
|--------|-----------------------------------------------------------------|-------------------------------------------------------------------------------------------|-------------------------------------------------------------------------------------------------|---------------------------------------------------------------------------------------|---------------------------------------------------------------------------------------------|--------------------------------------------------------------------------------------------|
| CGCBIB | $k$<br>$n_{k,\bullet}$<br>direct assignment<br>$\varpi = 100\%$ | Topic 1<br>65 059                                                                         | Topic 2<br>41 005                                                                               | Topic 3<br>33 714                                                                     | Topic 4<br>27 221                                                                           | Topic 5<br>22 813                                                                          |
|        |                                                                 | elegans<br>caenorhabditi<br>protein<br>gene<br>function<br>proteins<br>required<br>show   | elegans<br>genetic<br>caenorhabditi<br>nematode<br>molecular<br>development<br>studies<br>model | elegans<br>caenorhabditi<br>nematode<br>results<br>observed<br>high<br>type<br>effect | mutations<br>elegans<br>gene<br>mutants<br>genes<br>caenorhabditi<br>mutant<br>function     | elegans<br>gene<br>sequence<br>caenorhabditi<br>protein<br>amino<br>cdna<br>acid           |
| CGCBIB | $k$<br>$n_{k,\bullet}$<br>direct assignment<br>$\varpi = 75\%$  | Topic 68<br>1 921                                                                         | Topic 69<br>1 894                                                                               | Topic 70<br>1 836                                                                     | Topic 71<br>1 828                                                                           | Topic 72<br>1 776                                                                          |
|        |                                                                 | loci<br>genetic<br>strains<br>lines<br>life<br>mutations<br>mutation<br>inbred            | worm<br>elegans<br>research<br>caenorhabditi<br>brenner<br>years<br>nematode<br>biology         | cell<br>epithelial<br>junctions<br>membrane<br>cells<br>dlg<br>hmp<br>exc             | alpha<br>gpa<br>egl<br>signaling<br>protein<br>goa<br>rgs<br>proteins                       | unc<br>gaba<br>receptors<br>receptor<br>resistance<br>lev<br>levamisole<br>cholinergic     |
| CGCBIB | $k$<br>$n_{k,\bullet}$<br>direct assignment<br>$\varpi = 50\%$  | Topic 137<br>782                                                                          | Topic 138<br>779                                                                                | Topic 139<br>779                                                                      | Topic 140<br>763                                                                            | Topic 141<br>756                                                                           |
|        |                                                                 | cell<br>dimensional<br>microscopy<br>embryo<br>analysis<br>system<br>computer<br>time     | hsp<br>heat<br>shock<br>chaperone<br>small<br>proteins<br>crystallin<br>hsps                    | survival<br>mortality<br>model<br>data<br>gompertz<br>parameter<br>population<br>rate | acid<br>amino<br>acids<br>nematode<br>glycine<br>briggsae<br>cytochrome<br>multiple         | yeast<br>cerevisiae<br>saccharomyces<br>pombe<br>cell<br>budding<br>schizosacchar<br>cycle |
| CGCBIB | $k$<br>$n_{k,\bullet}$<br>direct assignment<br>$\varpi = 25\%$  | Topic 206<br>364                                                                          | Topic 207<br>359                                                                                | Topic 208<br>358                                                                      | Topic 209<br>343                                                                            | Topic 210<br>343                                                                           |
|        |                                                                 | activity<br>lh<br>activities<br>juvenile<br>nematodes<br>antiallatal<br>hormone<br>insect | pgp<br>mrp<br>aat<br>cells<br>glycoprotein<br>mammalian<br>resistance<br>glycoproteins          | telomere<br>telomeres<br>ceh<br>yeast<br>nematode<br>mrt<br>telomerase<br>telomeric   | gcy<br>guanylyl<br>cyclase<br>wee<br>ase<br>receptor<br>cyclases<br>gfp                     | mediator<br>med<br>sop<br>transcription<br>development<br>pvl<br>transcription<br>dhp      |
| CGCBIB | $k$<br>$n_{k,\bullet}$<br>direct assignment<br>$\varpi = 5\%$   | Topic 261<br>164                                                                          | Topic 262<br>164                                                                                | Topic 263<br>159                                                                      | Topic 264<br>157                                                                            | Topic 265<br>156                                                                           |
|        |                                                                 | cog<br>wd<br>repeat<br>connection<br>native<br>response<br>worm<br>nr                     | atp<br>structures<br>oligomerizati<br>family<br>binding<br>members<br>stability<br>mechanism    | calcineurin<br>egg<br>bovine<br>laying<br>hg<br>white<br>haemin<br>phosphatase        | selection<br>flow<br>separation<br>redundancy<br>flows<br>directional<br>solution<br>period | srl<br>rol<br>threshold<br>ra<br>energy<br>free<br>external<br>experimental                |



## E Appendix: quantile summary of topics for NEURIPS

Here we display a multi-quantile summary for NeurIPS, obtained by ranking all topics with at least 100 tokens by their total number of tokens, computing the  $\varpi = 100\%$ , 75%, 50%, 25%, and 5% quantiles. We compute the five topics closest to each quantile by number of tokens, and display their top-eight words.

|         |                                         |               |             |               |             |               |
|---------|-----------------------------------------|---------------|-------------|---------------|-------------|---------------|
| NeurIPS | $k$<br>$n_{k,\cdot}$                    | Topic 1       | Topic 2     | Topic 3       | Topic 4     | Topic 5       |
|         |                                         | 182 743       | 162 355     | 129 745       | 52 356      | 44 155        |
| NeurIPS | partially collapsed<br>$\varpi = 100\%$ | system        | function    | number        | model       | training      |
|         |                                         | information   | case        | result        | neural      | set           |
|         |                                         | approach      | result      | small         | result      | data          |
|         |                                         | set           | term        | values        | system      | test          |
|         |                                         | problem       | parameter   | order         | activity    | performance   |
|         |                                         | research      | neural      | large         | input       | number        |
|         |                                         | computer      | form        | effect        | pattern     | result        |
|         |                                         | single        | defined     | high          | function    | error         |
| NeurIPS | $k$<br>$n_{k,\cdot}$                    | Topic 148     | Topic 149   | Topic 150     | Topic 151   | Topic 152     |
|         |                                         | 2 585         | 2 585       | 2 574         | 2 559       | 2 549         |
| NeurIPS | partially collapsed<br>$\varpi = 75\%$  | genetic       | delay       | bengio        | fig         | matching      |
|         |                                         | algorithm     | bifurcation | output        | properties  | model         |
|         |                                         | population    | oscillation | dependencies  | proc        | point         |
|         |                                         | fitness       | point       | input         | step        | correspondenc |
|         |                                         | string        | stability   | experiment    | range       | match         |
|         |                                         | generation    | fixed       | frasconi      | structure   | problem       |
|         |                                         | bit           | limit       | term          | calculation | set           |
|         |                                         | function      | hopf        | information   | illinois    | object        |
| NeurIPS | $k$<br>$n_{k,\cdot}$                    | Topic 297     | Topic 298   | Topic 299     | Topic 300   | Topic 301     |
|         |                                         | 1 310         | 1 309       | 1 309         | 1 297       | 1 295         |
| NeurIPS | partially collapsed<br>$\varpi = 50\%$  | vor           | routing     | speaker       | delay       | memory        |
|         |                                         | storage       | load        | recognition   | input       | action        |
|         |                                         | anastasio     | network     | normalization | transition  | states        |
|         |                                         | responses     | path        | male          | window      | agent         |
|         |                                         | velocity      | packet      | feature       | width       | sensing       |
|         |                                         | pan           | traffic     | female        | connection  | loop          |
|         |                                         | rotation      | shortest    | mntn          | information | history       |
|         |                                         | vestibular    | policy      | ntn           | temporal    | mdp           |
| NeurIPS | $k$<br>$n_{k,\cdot}$                    | Topic 446     | Topic 447   | Topic 448     | Topic 449   | Topic 450     |
|         |                                         | 748           | 748         | 746           | 739         | 735           |
| NeurIPS | partially collapsed<br>$\varpi = 25\%$  | composite     | psom        | limited       | tau         | cmm           |
|         |                                         | mdp           | robot       | interconnect  | hypothesis  | speed         |
|         |                                         | action        | camera      | fan           | mansour     | particle      |
|         |                                         | elemental     | set         | shunting      | growth      | particles     |
|         |                                         | optimal       | pointing    | modularity    | coefficient | pattern       |
|         |                                         | payoff        | coordinates | collective    | function    | presence      |
|         |                                         | solution      | basis       | linear        | stem        | method        |
|         |                                         | mdt           | ritter      | unit          | large       | card          |
| NeurIPS | $k$<br>$n_{k,\cdot}$                    | Topic 566     | Topic 567   | Topic 568     | Topic 569   | Topic 570     |
|         |                                         | 396           | 385         | 383           | 379         | 372           |
| NeurIPS | partially collapsed<br>$\varpi = 5\%$   | morph         | minimal     | visualization | periodic    | machine       |
|         |                                         | kernel        | root        | high          | period      | capacity      |
|         |                                         | parent        | biases      | low           | coefficient | path          |
|         |                                         | human         | attribute   | diagram       | primitive   | trouble       |
|         |                                         | busey         | remove      | visualizing   | homogeneous | high          |
|         |                                         | similar       | rumelhart   | graphic       | tst         | task          |
|         |                                         | exemplar      | row         | fund          | mhaskar     | increasing    |
|         |                                         | distinctivene | exponential | window        | chain       | measures      |

|         |                        |                                            |                                                                                    |                                                                                          |                                                                                      |                                                                                           |                                                                                                  |
|---------|------------------------|--------------------------------------------|------------------------------------------------------------------------------------|------------------------------------------------------------------------------------------|--------------------------------------------------------------------------------------|-------------------------------------------------------------------------------------------|--------------------------------------------------------------------------------------------------|
| NeurIPS | $k$<br>$n_{k,\bullet}$ | subcluster split-merge<br>$\varpi = 100\%$ | Topic 6<br>473 770                                                                 | Topic 2<br>93 435                                                                        | Topic 1<br>52 418                                                                    | Topic 13<br>50 965                                                                        | Topic 62<br>41 565                                                                               |
|         |                        |                                            | network<br>model<br>learning<br>function<br>input<br>neural<br>algorithm<br>set    | network<br>unit<br>input<br>learning<br>training<br>weight<br>neural<br>output           | model<br>neuron<br>input<br>network<br>cell<br>system<br>unit<br>visual              | model<br>data<br>parameter<br>network<br>algorithm<br>mixture<br>function<br>gaussian     | function<br>network<br>bound<br>dimension<br>learning<br>result<br>number<br>set                 |
| NeurIPS | $k$<br>$n_{k,\bullet}$ | subcluster split-merge<br>$\varpi = 75\%$  | Topic 440<br>2 678                                                                 | Topic 170<br>2 657                                                                       | Topic 334<br>2 643                                                                   | Topic 418<br>2 636                                                                        | Topic 312<br>2 622                                                                               |
|         |                        |                                            | learning<br>critic<br>function<br>actor<br>algorithm<br>system<br>control<br>model | movement<br>visual<br>vector<br>image<br>model<br>location<br>eye<br>map                 | motion<br>unit<br>direction<br>model<br>stage<br>input<br>network<br>cell            | learning<br>algorithm<br>action<br>advantage<br>system<br>function<br>policy<br>control   | cell<br>correlation<br>neuron<br>model<br>unit<br>interaction<br>firing<br>set                   |
| NeurIPS | $k$<br>$n_{k,\bullet}$ | subcluster split-merge<br>$\varpi = 50\%$  | Topic 378<br>1 032                                                                 | Topic 322<br>1 028                                                                       | Topic 82<br>1 013                                                                    | Topic 344<br>1 009                                                                        | Topic 414<br>1 006                                                                               |
|         |                        |                                            | iii<br>cell<br>network<br>neural<br>response<br>model<br>point<br>fixed            | cell<br>spike<br>unit<br>function<br>firing<br>result<br>transfer<br>sorting             | model<br>response<br>neural<br>escape<br>interneuron<br>cockroach<br>leg<br>input    | form<br>word<br>phone<br>input<br>network<br>system<br>training<br>meaning                | component<br>algorithm<br>sources<br>analysis<br>data<br>noise<br>orientation<br>spatial         |
| NeurIPS | $k$<br>$n_{k,\bullet}$ | subcluster split-merge<br>$\varpi = 25\%$  | Topic 220<br>728                                                                   | Topic 341<br>723                                                                         | Topic 441<br>723                                                                     | Topic 447<br>722                                                                          | Topic 308<br>721                                                                                 |
|         |                        |                                            | aspect<br>object<br>view<br>node<br>learning<br>network<br>weight<br>equation      | element<br>pairing<br>grouping<br>group<br>saliency<br>contour<br>computation<br>optimal | network<br>neural<br>constraint<br>match<br>learn<br>problem<br>initial<br>row       | input<br>unit<br>spike<br>layer<br>learning<br>model<br>predict<br>prediction             | traffic<br>waiting<br>elevator<br>appeared<br>application<br>compared<br>department<br>found     |
| NeurIPS | $k$<br>$n_{k,\bullet}$ | subcluster split-merge<br>$\varpi = 5\%$   | Topic 259<br>509                                                                   | Topic 246<br>507                                                                         | Topic 195<br>506                                                                     | Topic 245<br>503                                                                          | Topic 293<br>503                                                                                 |
|         |                        |                                            | input<br>output<br>activation<br>data<br>encoded<br>function<br>hidden<br>model    | network<br>neural<br>task<br>link<br>food<br>nodes<br>output<br>recurrent                | network<br>symbol<br>vtp<br>learning<br>phrases<br>sentences<br>vpp<br>classificatio | network<br>equation<br>neuron<br>moment<br>neural<br>approximation<br>ohira<br>stochastic | network<br>function<br>adaptation<br>algorithm<br>prediction<br>projection<br>neural<br>training |

## F Appendix: topics produced by Algorithm 2 on PUBMED

Here we show top eight words for each topic together with total number of tokens assigned, which is shown at the top of each table. We display all topics containing at least eight unique word tokens.

|                 |               |             |               |               |               |
|-----------------|---------------|-------------|---------------|---------------|---------------|
| $k$             | Topic 1       | Topic 2     | Topic 3       | Topic 4       | Topic 5       |
| $n_{k,\bullet}$ | 47 322 709    | 40 229 486  | 34 685 122    | 30 795 166    | 30 707 144    |
| PubMed          | care          | age         | model         | cell          | gene          |
|                 | health        | risk        | data          | expression    | protein       |
|                 | patient       | children    | system        | growth        | dna           |
|                 | medical       | year        | time          | protein       | expression    |
|                 | research      | women       | analysis      | factor        | sequence      |
|                 | clinical      | patient     | effect        | receptor      | genes         |
|                 | system        | factor      | test          | kinase        | rna           |
|                 | cost          | population  | field         | beta          | region        |
| $k$             | Topic 6       | Topic 7     | Topic 8       | Topic 9       | Topic 10      |
| $n_{k,\bullet}$ | 28 510 997    | 27 277 306  | 26 709 116    | 26 408 263    | 25 200 662    |
| PubMed          | cell          | cancer      | patient       | rat           | cell          |
|                 | il            | tumor       | treatment     | receptor      | electron      |
|                 | cd            | patient     | mg            | effect        | muscle        |
|                 | mice          | carcinoma   | drug          | neuron        | tissue        |
|                 | antigen       | cell        | effect        | brain         | fiber         |
|                 | human         | breast      | therapy       | activity      | rat           |
|                 | lymphocytes   | survival    | dose          | stimulation   | development   |
|                 | immune        | tumour      | day           | induced       | microscopy    |
| $k$             | Topic 11      | Topic 12    | Topic 13      | Topic 14      | Topic 15      |
| $n_{k,\bullet}$ | 24 856 624    | 24 750 437  | 24 607 618    | 24 482 090    | 22 956 810    |
| PubMed          | patient       | patient     | blood         | patient       | infection     |
|                 | surgery       | artery      | pressure      | disease       | virus         |
|                 | complication  | heart       | flow          | clinical      | hiv           |
|                 | surgical      | coronary    | min           | diagnosis     | strain        |
|                 | treatment     | ventricular | effect        | lesion        | infected      |
|                 | year          | myocardial  | exercise      | brain         | patient       |
|                 | postoperative | cardiac     | arterial      | syndrome      | positive      |
|                 | operation     | left        | heart         | imaging       | viral         |
| $k$             | Topic 16      | Topic 17    | Topic 18      | Topic 19      | Topic 20      |
| $n_{k,\bullet}$ | 22 095 623    | 21 838 239  | 21 363 408    | 20 887 061    | 20 828 980    |
| PubMed          | ca            | structure   | concentration | pregnancy     | protein       |
|                 | effect        | binding     | degrees       | level         | binding       |
|                 | receptor      | protein     | samples       | women         | human         |
|                 | channel       | reaction    | liquid        | hormone       | antibodies    |
|                 | cell          | acid        | solution      | day           | acid          |
|                 | calcium       | interaction | assay         | fetal         | alpha         |
|                 | concentration | compound    | detection     | infant        | antibody      |
|                 | na            | site        | system        | concentration | gel           |
| $k$             | Topic 21      | Topic 22    | Topic 23      | Topic 24      | Topic 25      |
| $n_{k,\bullet}$ | 20 106 260    | 19 788 488  | 18 675 096    | 17 163 327    | 16 440 018    |
| PubMed          | rat           | bone        | patient       | gene          | activity      |
|                 | cell          | patient     | renal         | mutation      | acid          |
|                 | effect        | joint       | liver         | genetic       | enzyme        |
|                 | liver         | muscle      | transplantati | chromosome    | liver         |
|                 | mice          | fractures   | blood         | analysis      | concentration |
|                 | dose          | hip         | disease       | genes         | rat           |
|                 | drug          | year        | acute         | dna           | enzymes       |
|                 | mg            | implant     | chronic       | polymorphism  | synthesis     |

|                 |                                                                                             |                                                                                    |                                                                                   |                                                                              |                                                                                    |
|-----------------|---------------------------------------------------------------------------------------------|------------------------------------------------------------------------------------|-----------------------------------------------------------------------------------|------------------------------------------------------------------------------|------------------------------------------------------------------------------------|
| $k$             | Topic 26                                                                                    | Topic 27                                                                           | Topic 28                                                                          | Topic 29                                                                     | Topic 30                                                                           |
| $n_{k,\bullet}$ | 16 136 164                                                                                  | 14 201 063                                                                         | 13 706 016                                                                        | 13 191 158                                                                   | 13 105 245                                                                         |
| PubMed          | effect<br>platelet<br>induced<br>oxide<br>rat<br>cell<br>endothelial<br>activity            | diet<br>weight<br>intake<br>food<br>body<br>effect<br>acid<br>vitamin              | patient<br>disease<br>gastric<br>asthma<br>test<br>pylori<br>arthritis<br>chronic | strain<br>plant<br>growth<br>acid<br>bacteria<br>activity<br>cell<br>species | protein<br>membrane<br>cell<br>domain<br>binding<br>receptor<br>lipid<br>membranes |
| $k$             | Topic 31                                                                                    | Topic 32                                                                           | Topic 33                                                                          | Topic 34                                                                     | Topic 35                                                                           |
| $n_{k,\bullet}$ | 12 705 261                                                                                  | 12 624 252                                                                         | 10 422 885                                                                        | 9 850 167                                                                    | 7 027 660                                                                          |
| PubMed          | insulin<br>glucose<br>diabetes<br>cholesterol<br>level<br>diabetic<br>plasma<br>lipoprotein | species<br>population<br>infection<br>animal<br>egg<br>host<br>parasite<br>malaria | exposure<br>concentration<br>iron<br>level<br>water<br>effect<br>exposed<br>lead  | skin<br>patient<br>eyes<br>eye<br>retinal<br>laser<br>visual<br>corneal      | level<br>patient<br>ml<br>control<br>serum<br>plasma<br>factor<br>concentration    |
| $k$             | Topic 36                                                                                    | Topic 37                                                                           | Topic 38                                                                          | Topic 39                                                                     | Topic 40                                                                           |
| $n_{k,\bullet}$ | 6 130 945                                                                                   | 644 182                                                                            | 2 264                                                                             | 1 325                                                                        | 104                                                                                |
| PubMed          | dental<br>oral<br>teeth<br>tooth<br>periodontal<br>treatment<br>salivary<br>gland           | sleep<br>caffeine<br>tea<br>effect<br>theophylline<br>night<br>coffee<br>green     | ppr<br>csc<br>stretch<br>pthrp<br>response<br>br<br>gei<br>pth                    | pac<br>foal<br>cpr<br>pacap<br>edm<br>speck<br>branchial<br>lth              | feather<br>tieg<br>sorghum<br>coii<br>phycocyanin<br>vanx<br>midrib<br>ifi         |
| $k$             | Topic 41                                                                                    |                                                                                    |                                                                                   |                                                                              |                                                                                    |
| $n_{k,\bullet}$ | 104                                                                                         |                                                                                    |                                                                                   |                                                                              |                                                                                    |
| PubMed          | steer<br>mca<br>persistency<br>buckwheat<br>dnak<br>eset<br>branding<br>akr                 |                                                                                    |                                                                                   |                                                                              |                                                                                    |
